# Supplementary material for: Comparative transcriptome analysis reveals the involvement of an MYB transcriptional activator, SmMYB108, in anther dehiscence in eggplant
Source: Frontiers journal article supplement (doi:10.3389/fpls.2023.1164467), 2023-07-11
Supplement: Data_Sheet_1.pdf [file Data_Sheet_1.pdf]

# Comparative Transcriptome Analysis Reveals the Involvement of an MYB Transcriptional Activator, *SmMYB108*, in Anther Dehiscence in Eggplant

Ruolin Hu<sup>a, b†</sup>, Jiali Wang<sup>a, b, †</sup>, Huiqing Yang<sup>a, b</sup>, Dayong Wei<sup>a, b</sup>, Qinglin Tang<sup>a, b</sup>,

Yang Yang<sup>c</sup>, Shibing Tian<sup>c\*</sup>, Zhimin Wang<sup>a, b, \*</sup>

<sup>a</sup>*College of Horticulture and Landscape Architecture, Southwest University, Chongqing 400715, China*

<sup>b</sup>*Key Laboratory of Horticulture Science for Southern Mountainous Regions, Ministry of Education, Chongqing 400715, China*

<sup>c</sup>*The Institute of Vegetables and Flowers, Chongqing Academy of Agricultural Sciences, Chongqing 400055, China*

<sup>c</sup>*The Institute of Vegetables and Flowers, Chongqing Academy of Agricultural Sciences, Chongqing 400055, China*

<sup>c</sup>*The Institute of Vegetables and Flowers, Chongqing Academy of Agricultural Sciences, Chongqing 400055, China*

†These authors contributed equally to the work.

\*Corresponding author.

E-mail addresses: minznwang\_555@163.com (Z.M. Wang), [2508436730@qq.com](mailto:2508436730@qq.com) (S.B. Tian)

## SUPPLEMENTAL FIGURES

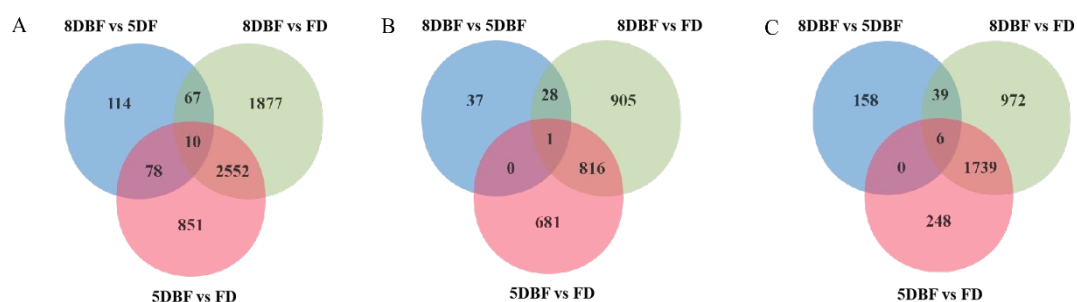

Supplementary Figure S1 Venn diagram of of DEGs between the eggplant fertile line F142 in different stages of flower buds

A: Venn diagram of all DEGs; B: Venn diagram of up-regulated genes; C: Venn diagram of down-regulated genes.

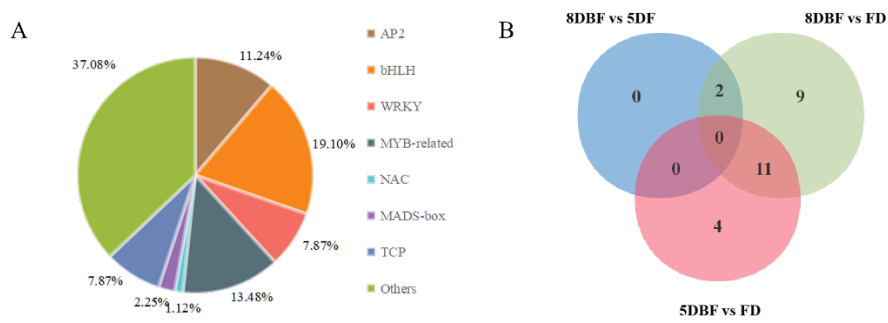

Supplementary Figure S2 Analysis of transcription factor differentially expressed gene  
A: Distribution of differentially expressed transcription factors; B: Venn diagram of MYB transcription factor differentially expressed genes;

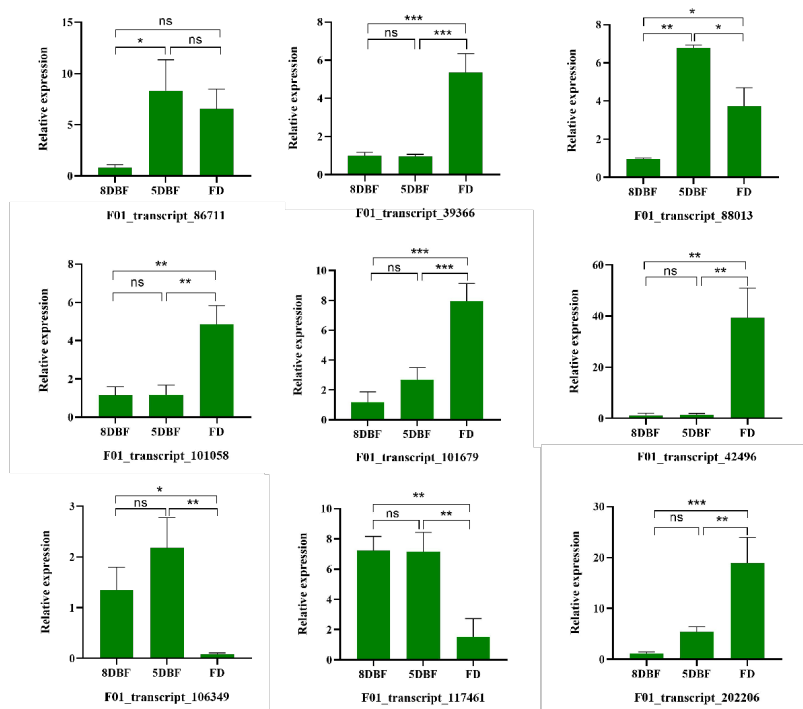

Supplementary Figure S3 Validation of plant gedifferentially expressed genesnes by qRT-PCR  
\* $P < 0.05$ , \*\* $P < 0.01$
