# Supplementary material for: Comparative transcriptome analysis reveals the involvement of an MYB transcriptional activator, SmMYB108, in anther dehiscence in eggplant
Source: Front Plant Sci. 2023 Jul 11;14:1164467. doi: 10.3389/fpls.2023.1164467 (PMC10382176; doi:10.3389/fpls.2023.1164467)
Supplement: Supplementary file 2 [file Table_1.xlsx]

## Sheet: Supplementary Table 1
Primers for qRT-PCR used to validate the RNA-Seq results and explor the expression of SmMYB108
Gene ID	Sense Primer (5' to 3')	Antisense Primer (5' to 3')
F01_transcript_86711	CTCCCTAGCTAAATCTGCTG	CTCATTATCTGTTCTTCCAG
F01_transcript_39366	CGGATGGGTCGATCATGAAG	CATGAGCAGGATCATCAG
F01_transcript_88013	GGACAAGGAAGTTCAGAGC	CCATTGTATGAAGTTGGAG
F01_transcript_101058	CAGGCATCCCACCCTTTAGAAG	GGAGCTTTTGCATTATTCATC
F01_transcript_101679	GAATGAGCCACCAAAATATG	CTGAGGTGGAGGAGCAGCAG
F01_transcript_42496	GATGGCTTAACTATCTTCGACC	ACGCCAGTAATTCTTGATC
F01_transcript_106349	GAAGATGAAGATGATCTTATAG	GCGTATTCCAATAATTC
F01_transcript_117461	GAGTTGCAGGCTCAGGTGG	CCTATTGCCTAAGAGAGCATG
F01_transcript_202206	AGTATTTGAATGCCGATGAG	CGTCATCGGGTCATCAAATTC
SmMYB108	CGGTATGGATCTTCGAAGGG	TGGTCGAAGATAGTTAAGCC
GAPDH	TCTTCACTGACAAGGACAAGGCTGC	AGTTTTCTGGGTGGCAGTCATAGCG
Primer sequences for vector construction
Name	Sense Primer (5' to 3')	Antisense Primer (5' to 3')
1300-SmMYB108	ATACACCAAATCGACTCTAGAATGGATCATTATGAGAAAATTGAAGTTG	CATGGTACCGGATCCACTAGTCATGTCATTGTTCAATTGTTGTTGTAA
2301G-SmMYB108	CGGGATCCATGGATCATTATGAGAAAAT	CGAGCTCTCACATGTCATTGTTCAATT
BD-SmMYB108-Full	CGCCATATGATGAAAAATAATCGAGAAAT	CGCGGATCCTCACATGTCATTGTTCAATT
BD-SmMYB108(1-136aa)	TCCCCCGGGTATGGATCATTATGAGAAAATTG	GCGTCGACTTTTTGTACTCGAGTACGCC
BD-SmMYB108(137-318aa)	TCCCCCGGGTCATGCGAAACAACTCAAATG	GCGTCGACTCACATGTCATTGTTCAATTG
BD-SmMYB108(1-261aa)	TCCCCCGGGTATGGATCATTATGAGAAAATTG	GCGTCGACAGTACTTTGATTAACTTGAG
BD-SmMYB108(262-318aa)	TCCCCCGGGTAATCATTTGTGCTATGGAGAC	GCGTCGACTCACATGTCATTGTTCAATTG
BD-SmMYB108(1-288aa)	TCCCCCGGGTATGGATCATTATGAGAAAATT	GCGTCGACCACTTCTTGGAATCCTTGAAATC
BD-SmMYB108(289-318aa)	TCCCCCGGGTGATCAACAAAACAATACACAATG	GCGTCGACTCACATGTCATTGTTCAATTG
BD-SmMYB108(262-288aa)	TCCCCCGGGTAATCATTTGTGCTATGGAGAC	GCGTCGACCACTTCTTGGAATCCTTGAAATC
PrSmMYB108	ACATATTGATCCGTTGTCGCTTAC	CCTTCGAAGATCCATACCGATATC
162-PrSmMYB108	GGGGTACCAGAGTGGGATTTAATCTATTTA	TTGGCGCGCCCTAAACTTGATGGGACTTTA
pAbAi-PrSmMYB108	CGAGCTCACATAGAGTGGGATTTAATC	TCCCCCGGGCTAAACTTGATGGGACTTTA
AD-SmMYB21	TCCCCCGGGTATGGGAAGAATTCCATGTT	CCCTCGAGTCAAACCATGGGATTCATCA
AD-SmMYB26	TCCCCCGGGAATGGGGCATCATACATGTT	CCCTCGAGCTATGAATTCCAAGTTGTAC
0800-Luc-prSmMYB108	CGAGCTCATGGATCATTATGAGAAAATTG	CGGGATCCTCACATGTCATTGTTCAATTG
62-SK-SmMYB21	CGAGCTCATGGGAAGAATTCCATGTTG	CGGGATCCTCAAACCATGGGATTCATC
62-SK-SmMYB26	CCGCTCGAGATGGGGCATCATACATGTTG	GGGGTACCCTATGAATTCCAAGTTGTAC
Primer sequences for gene cloning
Name	Sense Primer (5' to 3')	Antisense Primer (5' to 3')
SmMYB108	ATGGATCATTATGAGAAAATTGAAGT	TCACATGTCATTGTTCAATTGTTGT
SmMYB21	ATGGGAAGAATTCCATGTTGTGA	TCAAACCATGGGATTCATCAGA
SmMYB26	ATGGGGCATCATACATGTTGT	CTATGAATTCCAAGTTGTACTAGGGT

## Sheet: Supplementary Table 2
The expression levels of transcription factors related to male sterility in eggplant
Gene ID	F142-1-1_F142-1-2_F142-1-3_vs_F142-2-1_F142-2-2_F142-2-3_FDR	F142-1-1_F142-1-2_F142-1-3_vs_F142-2-1_F142-2-2_F142-2-3_log2FC	F142-1-1_F142-1-2_F142-1-3_vs_F142-2-1_F142-2-2_F142-2-3_regulated	F142-1-1_F142-1-2_F142-1-3_vs_F142-3-1_F142-3-2_F142-3-3_FDR	F142-1-1_F142-1-2_F142-1-3_vs_F142-3-1_F142-3-2_F142-3-3_log2FC	F142-1-1_F142-1-2_F142-1-3_vs_F142-3-1_F142-3-2_F142-3-3_regulated	F142-2-1_F142-2-2_F142-2-3_vs_F142-3-1_F142-3-2_F142-3-3_FDR	F142-2-1_F142-2-2_F142-2-3_vs_F142-3-1_F142-3-2_F142-3-3_log2FC	F142-2-1_F142-2-2_F142-2-3_vs_F142-3-1_F142-3-2_F142-3-3_regulated	COG_class	COG_class_annotation	GO_annotation	KEGG_annotation	KEGG_pathway	KOG_class	KOG_class_annotation	Pfam_annotation	Swissprot_annotation	eggNOG_class	eggNOG_class_annotation	nr_annotation
F01_transcript_113757	7.61436e-05	-4.85438	down	0.000185504	-3.70866	down	--	--	--	--	--	Molecular Function: DNA binding (GO:0003677);;	K09422|0|sot:102583173|K09422 myb proto-oncogene protein, plant | (RefSeq) transcription factor RAX3	--	[K]	Transcription	Myb-like DNA-binding domain;; Myb-like DNA-binding domain	Transcription factor RAX3 GN=T16K5.40 OS=Arabidopsis thaliana (Mouse-ear cress) PE=2 SV=1	K	Transcription	PREDICTED: transcription factor RAX3-like [Solanum tuberosum]
F01_transcript_126706	--	--	--	0.000721954	5.46762	up	0.000396257	5.95409	up	--	--	Molecular Function: DNA binding (GO:0003677);; Molecular Function: transcription factor activity, sequence-specific DNA binding (GO:0003700);; Cellular Component: nucleus (GO:0005634);; Biological Process: regulation of transcription, DNA-templated (GO:0006355);;	--	--	--	--	AP2 domain	Ethylene-responsive transcription factor ABR1 GN=MVP7.8 OS=Arabidopsis thaliana (Mouse-ear cress) PE=2 SV=1	K	Transcription	PREDICTED: ethylene-responsive transcription factor ABR1-like isoform X1 [Solanum tuberosum]
F01_transcript_116043	--	--	--	0.000210621	3.37435	up	0.00327967	2.63985	up	--	--	Molecular Function: transcription factor activity, sequence-specific DNA binding (GO:0003700);; Biological Process: regulation of transcription, DNA-templated (GO:0006355);; Molecular Function: sequence-specific DNA binding (GO:0043565);;	--	--	--	--	WRKY DNA -binding domain	WRKY transcription factor 6 GN=WRKY6 OS=Arabidopsis thaliana (Mouse-ear cress) PE=1 SV=1	--	--	PREDICTED: WRKY transcription factor 6 [Solanum lycopersicum]
F01_transcript_121227	--	--	--	0.000819156	-1.95614	down	0.000259934	-2.11896	down	--	--	Molecular Function: protein dimerization activity (GO:0046983);;	K04733|0|sly:101259435|K04733 interleukin-1 receptor-associated kinase 4 [EC:2.7.11.1] | (RefSeq) probable serine/threonine-protein kinase At1g01540	--	--	--	Helix-loop-helix DNA-binding domain	Transcription factor SPATULA OS=Arabidopsis thaliana (Mouse-ear cress) PE=1 SV=1	S	Function unknown	PREDICTED: transcription factor SPATULA-like [Solanum tuberosum]
F01_transcript_145761	--	--	--	0.0067335	2.52026	up	0.000787394	3.15634	up	--	--	Molecular Function: protein dimerization activity (GO:0046983);;	--	--	--	--	Helix-loop-helix DNA-binding domain	Transcription factor bHLH93 GN=K21L13.16 OS=Arabidopsis thaliana (Mouse-ear cress) PE=1 SV=1	K	Transcription	PREDICTED: transcription factor bHLH93-like [Solanum tuberosum]
F01_transcript_154435	--	--	--	0.000471667	-2.66321	down	0.00787962	-2.31047	down	--	--	Biological Process: response to water deprivation (GO:0009414);;	--	--	[K]	Transcription	Histone-like transcription factor (CBF/NF-Y) and archaeal histone;; Core histone H2A/H2B/H3/H4	Nuclear transcription factor Y subunit C-1 GN=T8P19.100 OS=Arabidopsis thaliana (Mouse-ear cress) PE=1 SV=1	K	Transcription	PREDICTED: nuclear transcription factor Y subunit C-1-like isoform X2 [Solanum tuberosum]
F01_transcript_155374	--	--	--	0.00556631	2.86735	up	0.00247603	3.21247	up	--	--	Molecular Function: protein dimerization activity (GO:0046983);;	--	--	--	--	Helix-loop-helix DNA-binding domain	Transcription factor bHLH93 GN=K21L13.16 OS=Arabidopsis thaliana (Mouse-ear cress) PE=1 SV=1	K	Transcription	PREDICTED: transcription factor bHLH93-like [Solanum tuberosum]
F01_transcript_136078	--	--	--	1.80053e-07	5.41412	up	8.75325e-05	3.75641	up	--	--	Molecular Function: DNA binding (GO:0003677);; Molecular Function: transcription factor activity, sequence-specific DNA binding (GO:0003700);; Cellular Component: nucleus (GO:0005634);; Biological Process: regulation of transcription, DNA-templated (GO:0006355);;	--	--	--	--	AP2 domain	Ethylene-responsive transcription factor ABR1 GN=MVP7.8 OS=Arabidopsis thaliana (Mouse-ear cress) PE=2 SV=1	K	Transcription	PREDICTED: ethylene-responsive transcription factor ABR1-like isoform X1 [Solanum tuberosum]
F01_transcript_128792	--	--	--	0.000129753	2.78134	up	1.99618e-05	3.27413	up	--	--	--	--	--	--	--	WRKY DNA -binding domain	Probable WRKY transcription factor 14 GN=WRKY14 OS=Arabidopsis thaliana (Mouse-ear cress) PE=2 SV=2	K	Transcription	PREDICTED: probable WRKY transcription factor 14-like [Solanum tuberosum]
F01_transcript_135005	--	--	--	0.00015589	-3.27328	down	0.00144654	-2.97807	down	--	--	Molecular Function: transcription factor activity, sequence-specific DNA binding (GO:0003700);; Biological Process: regulation of transcription, DNA-templated (GO:0006355);; Molecular Function: sequence-specific DNA binding (GO:0043565);;	--	--	--	--	WRKY DNA -binding domain	Probable WRKY transcription factor 70 GN=WRKY70 OS=Arabidopsis thaliana (Mouse-ear cress) PE=2 SV=1	K	Transcription	WRKY transcription factor [Solanum habrochaites]
F01_transcript_194343	0.000146647	4.87135	up	--	--	--	0.00369275	-2.92751	down	--	--	Molecular Function: protein dimerization activity (GO:0046983);;	--	--	--	--	Helix-loop-helix DNA-binding domain	Transcription factor bHLH79 GN=MRG21.2 OS=Arabidopsis thaliana (Mouse-ear cress) PE=2 SV=1	K	Transcription	PREDICTED: transcription factor bHLH79-like [Solanum tuberosum]
F01_transcript_40228	0.00176444	2.97636	up	--	--	--	0.00361907	-2.25964	down	--	--	Molecular Function: protein dimerization activity (GO:0046983);;	--	--	--	--	Helix-loop-helix DNA-binding domain	Transcription factor bHLH79 GN=MRG21.2 OS=Arabidopsis thaliana (Mouse-ear cress) PE=2 SV=1	K	Transcription	PREDICTED: transcription factor bHLH79-like [Solanum tuberosum]
F01_transcript_42496	--	--	--	6.38867e-18	5.33683	up	2.9233e-16	5.13563	up	--	--	Molecular Function: DNA binding (GO:0003677);;	K09422|5.89646e-162|sot:102606117|K09422 myb proto-oncogene protein, plant | (RefSeq) transcription factor MYB108	--	[K]	Transcription	Myb-like DNA-binding domain;; Myb-like DNA-binding domain	Transcription factor MYB108 GN=F5E6.18 OS=Arabidopsis thaliana (Mouse-ear cress) PE=1 SV=1	K	Transcription	PREDICTED: transcription factor MYB21-like [Solanum tuberosum]
F01_transcript_41343	--	--	--	1.07154e-06	#NAME?	down	2.71575e-05	#NAME?	down	--	--	Molecular Function: DNA binding (GO:0003677);;	K09422|1.45549e-168|sot:102584044|K09422 myb proto-oncogene protein, plant | (RefSeq) transcription factor MYB21	--	[K]	Transcription	Myb-like DNA-binding domain;; Myb-like DNA-binding domain	Transcription factor MYB86 GN=F21E10.4 OS=Arabidopsis thaliana (Mouse-ear cress) PE=2 SV=1	K	Transcription	PREDICTED: transcription factor MYB86-like [Solanum tuberosum]
F01_transcript_16429	0.00581775	4.52195	up	1.05641e-07	4.6259	up	--	--	--	--	--	--	K18835|1.08753e-137|sot:102587930|K18835 WRKY transcription factor 2 | (RefSeq) WRKY transcription factor SUSIBA2-like	ko04626:Plant-pathogen interaction	--	--	WRKY DNA -binding domain	Probable WRKY transcription factor 4 GN=WRKY4 OS=Arabidopsis thaliana (Mouse-ear cress) PE=1 SV=2	--	--	PREDICTED: probable WRKY transcription factor 2-like [Solanum tuberosum]
F01_transcript_37631	2.32237e-05	-5.68523	down	--	--	--	0.00186648	7.64059	up	--	--	Molecular Function: protein dimerization activity (GO:0046983);;	K13422|0|sot:102597494|K13422 transcription factor MYC2 | (RefSeq) transcription factor MYC2-like	ko04075:Plant hormone signal transduction	--	--	bHLH-MYC and R2R3-MYB transcription factors N-terminal;; Helix-loop-helix DNA-binding domain	Transcription factor bHLH14 OS=Arabidopsis thaliana (Mouse-ear cress) PE=2 SV=1	K	Transcription	PREDICTED: transcription factor MYC2-like [Solanum tuberosum]
F01_transcript_99712	1.57432e-05	5.37412	up	3.71812e-07	4.98949	up	--	--	--	--	--	Molecular Function: protein dimerization activity (GO:0046983);;	--	--	--	--	Helix-loop-helix DNA-binding domain	Transcription factor BPE GN=T30E16.21 OS=Arabidopsis thaliana (Mouse-ear cress) PE=2 SV=1	K	Transcription	PREDICTED: transcription factor bHLH79-like [Solanum tuberosum]
F01_transcript_167526	0.000398531	-4.03358	down	--	--	--	0.00615901	-2.64423	down	--	--	Molecular Function: transcription factor activity, sequence-specific DNA binding (GO:0003700);; Biological Process: regulation of transcription, DNA-templated (GO:0006355);; Molecular Function: sequence-specific DNA binding (GO:0043565);;	K14431|0|sot:102594517|K14431 transcription factor TGA | (RefSeq) transcription factor TGA2-like	ko04075:Plant hormone signal transduction	--	--	Seed dormancy control;; Basic region leucine zipper;; bZIP transcription factor	Transcription factor HBP-1b(c1) (Fragment) OS=Triticum aestivum (Wheat) PE=1 SV=2	K	Transcription	PREDICTED: transcription factor HBP-1b(c1)-like [Solanum tuberosum]
F01_transcript_86443	0.00054767	-2.43764	down	--	--	--	0.000648774	-2.50619	down	--	--	Molecular Function: protein dimerization activity (GO:0046983);;	--	--	--	--	Helix-loop-helix DNA-binding domain	Transcription factor ICE1 OS=Arabidopsis thaliana (Mouse-ear cress) PE=1 SV=1	--	--	PREDICTED: transcription factor ICE1-like [Nicotiana tomentosiformis]
F01_transcript_81532	0.00331037	1.68358	up	--	--	--	0.00285991	1.75089	up	--	--	Molecular Function: transcription factor activity, sequence-specific DNA binding (GO:0003700);; Biological Process: regulation of transcription, DNA-templated (GO:0006355);; Biological Process: multicellular organism development (GO:0007275);; Biological Process: response to water deprivation (GO:0009414);; Molecular Function: sequence-specific DNA binding (GO:0043565);;	K18835|0|sot:102590856|K18835 WRKY transcription factor 2 | (RefSeq) StWRKY11; probable WRKY transcription factor 2	ko04626:Plant-pathogen interaction	--	--	WRKY DNA -binding domain;; WRKY DNA -binding domain	Probable WRKY transcription factor 2 GN=WRKY2 OS=Arabidopsis thaliana (Mouse-ear cress) PE=2 SV=1	K	Transcription	PREDICTED: probable WRKY transcription factor 2-like isoform X3 [Solanum tuberosum]
F01_transcript_46365	0.0093436	1.76402	up	--	--	--	0.00354725	1.6987	up	--	--	Molecular Function: DNA binding (GO:0003677);; Molecular Function: transcription factor activity, sequence-specific DNA binding (GO:0003700);; Cellular Component: nucleus (GO:0005634);; Biological Process: regulation of transcription, DNA-templated (GO:0006355);; Biological Process: response to water deprivation (GO:0009414);; Biological Process: regulation of ethylene-activated signaling pathway…	K09286|3.31513e-149|sot:102601077|K09286 EREBP-like factor | (RefSeq) ethylene-responsive transcription factor RAP2-12-like	--	--	--	--	Ethylene-responsive transcription factor 1 GN=OJ1311_D08.9 OS=Oryza sativa subsp. japonica (Rice) PE=1 SV=1	K	Transcription	PREDICTED: ethylene-responsive transcription factor RAP2-12-like [Solanum tuberosum]
F01_transcript_39366	3.80693e-07	2.78199	up	--	--	--	2.05243e-07	2.70257	up	--	--	Molecular Function: DNA binding (GO:0003677);; Cellular Component: nucleus (GO:0005634);; Biological Process: regulation of transcription, DNA-templated (GO:0006355);; Molecular Function: zinc ion binding (GO:0008270);; Biological Process: response to ethylene (GO:0009723);;	--	--	--	--	Myb-like DNA-binding domain	Transcription factor DIVARICATA GN=DIVARICATA OS=Antirrhinum majus (Garden snapdragon) PE=2 SV=1	K	Transcription	PREDICTED: transcription factor MYB1R1 [Solanum lycopersicum]
F01_transcript_27949	4.60203e-05	-4.12349	down	--	--	--	0.00206021	-2.67898	down	--	--	--	K09285|0|sot:102594405|K09285 AP2-like factor, ANT lineage | (RefSeq) AP2-like ethylene-responsive transcription factor AIL1	--	--	--	AP2 domain	AP2-like ethylene-responsive transcription factor AIL1 GN=AIL1 OS=Arabidopsis thaliana (Mouse-ear cress) PE=2 SV=1	K	Transcription	PREDICTED: AP2-like ethylene-responsive transcription factor AIL1-like [Solanum tuberosum]
F01_transcript_169939	0.00218987	2.8699	up	--	--	--	0.0013069	3.09664	up	--	--	Molecular Function: protein dimerization activity (GO:0046983);;	--	--	--	--	Helix-loop-helix DNA-binding domain	Transcription factor bHLH93 GN=K21L13.16 OS=Arabidopsis thaliana (Mouse-ear cress) PE=1 SV=1	K	Transcription	PREDICTED: transcription factor bHLH93 [Solanum lycopersicum]
F01_transcript_190379	4.99804e-07	6.11269	up	--	--	--	9.49452e-08	7.61	up	--	--	Molecular Function: DNA binding (GO:0003677);; Molecular Function: transcription factor activity, sequence-specific DNA binding (GO:0003700);; Cellular Component: nucleus (GO:0005634);; Biological Process: regulation of transcription, DNA-templated (GO:0006355);;	--	--	--	--	--	Ethylene-responsive transcription factor ABR1 GN=MVP7.8 OS=Arabidopsis thaliana (Mouse-ear cress) PE=2 SV=1	K	Transcription	PREDICTED: ethylene-responsive transcription factor ABR1-like isoform X1 [Solanum tuberosum]
F01_transcript_202959	1.34432e-39	12.583	up	--	--	--	5.07398e-29	7.68951	up	--	--	Molecular Function: DNA binding (GO:0003677);; Molecular Function: chromatin binding (GO:0003682);; Molecular Function: transcription factor activity, sequence-specific DNA binding (GO:0003700);; Molecular Function: transcription coactivator activity (GO:0003713);; Molecular Function: histone acetyltransferase activity (GO:0004402);; Cellular Component: nucleus (GO:0005634);; Biological Process: …	--	--	--	--	--	Transcription factor MYB1R1 OS=Solanum tuberosum (Potato) PE=2 SV=1	--	--	PREDICTED: transcription factor DIVARICATA-like [Solanum lycopersicum]
F01_transcript_46323	0.001791	2.19909	up	--	--	--	0.00172474	2.25486	up	--	--	Molecular Function: DNA binding (GO:0003677);; Molecular Function: transcription factor activity, sequence-specific DNA binding (GO:0003700);; Cellular Component: nucleus (GO:0005634);; Cellular Component: cytoplasm (GO:0005737);; Cellular Component: plasma membrane (GO:0005886);; Biological Process: cell death (GO:0008219);; Biological Process: heat acclimation (GO:0010286);; Biological Process:…	K09286|1.30388e-124|sot:102594588|K09286 EREBP-like factor | (RefSeq) cip353; ethylene-responsive transcription factor RAP2-3	--	--	--	AP2 domain	Ethylene-responsive transcription factor RAP2-3 OS=Arabidopsis thaliana (Mouse-ear cress) PE=1 SV=2	K	Transcription	PREDICTED: ethylene-responsive transcription factor RAP2-3-like [Solanum tuberosum]
F01_transcript_187668	1.39455e-06	3.39477	up	--	--	--	0.000197225	2.68974	up	--	--	Molecular Function: DNA binding (GO:0003677);; Molecular Function: transcription factor activity, sequence-specific DNA binding (GO:0003700);; Cellular Component: nucleus (GO:0005634);; Biological Process: regulation of transcription, DNA-templated (GO:0006355);;	K09286|9.55578e-123|sot:102602854|K09286 EREBP-like factor | (RefSeq) DREB3, DREB4; ethylene-responsive transcription factor RAP2-4-like	--	--	--	--	Ethylene-responsive transcription factor RAP2-4 OS=Arabidopsis thaliana (Mouse-ear cress) PE=1 SV=1	K	Transcription	PREDICTED: ethylene-responsive transcription factor RAP2-4-like [Solanum tuberosum]
F01_transcript_43971	1.06107e-09	-4.15417	down	--	--	--	9.4693e-06	-3.64099	down	--	--	Biological Process: regulation of leaf development (GO:2000024);;	--	--	--	--	TCP family transcription factor	Transcription factor TCP4 GN=K15M2.17 OS=Arabidopsis thaliana (Mouse-ear cress) PE=2 SV=1	--	--	TCP transcription factor 1 [Solanum lycopersicum]
F01_transcript_170605	0.000229751	4.99475	up	--	--	--	0.00327516	3.89584	up	--	--	--	K09422|1.78445e-128|sot:102587827|K09422 myb proto-oncogene protein, plant | (RefSeq) transcription factor MYB108-like	--	[K]	Transcription	Myb-like DNA-binding domain;; Myb-like DNA-binding domain	Transcription factor MYB108 GN=F5E6.18 OS=Arabidopsis thaliana (Mouse-ear cress) PE=1 SV=1	K	Transcription	PREDICTED: transcription factor MYB21-like [Solanum tuberosum]
F01_transcript_163549	5.04743e-08	10.7551	up	--	--	--	0.000525448	5.15738	up	--	--	Molecular Function: DNA binding (GO:0003677);;	K09422|5.45951e-102|sly:101250648|K09422 myb proto-oncogene protein, plant | (RefSeq) transcription factor MYB113-like	--	[K]	Transcription	--	Transcription factor MYB113 GN=MYB113 OS=Arabidopsis thaliana (Mouse-ear cress) PE=1 SV=1	K	Transcription	MYB transcription factor [Solanum melongena]
F01_transcript_45684	0.00126554	3.12966	up	--	--	--	0.00119652	3.09504	up	--	--	Molecular Function: DNA binding (GO:0003677);; Cellular Component: nucleus (GO:0005634);; Biological Process: regulation of transcription, DNA-templated (GO:0006355);; Biological Process: aging (GO:0007568);; Biological Process: single organism reproductive process (GO:0044702);; Biological Process: shoot system development (GO:0048367);; Biological Process: reproductive structure development (GO…	--	--	--	--	No apical meristem (NAM) protein	NAC transcription factor 29 GN=At1g69490 OS=Arabidopsis thaliana (Mouse-ear cress) PE=2 SV=1	K	Transcription	PREDICTED: NAC transcription factor 29-like [Solanum tuberosum]
F01_transcript_202206	8.10991e-09	4.44364	up	--	--	--	0.00154166	2.51489	up	--	--	Molecular Function: DNA binding (GO:0003677);;	--	--	[K]	Transcription	--	Transcription factor MYB44 GN=K8K14.2 OS=Arabidopsis thaliana (Mouse-ear cress) PE=2 SV=1	K	Transcription	PREDICTED: transcription factor MYB44-like [Solanum lycopersicum]
F01_transcript_53658	0.00549812	2.22897	up	--	--	--	--	--	--	--	--	--	--	--	--	--	--	Transcription factor UPBEAT1 GN=T8I13.11 OS=Arabidopsis thaliana (Mouse-ear cress) PE=2 SV=1	S	Function unknown	PREDICTED: transcription factor UPBEAT1-like [Nicotiana tomentosiformis]
F01_transcript_113419	0.00126472	5.38617	up	--	--	--	--	--	--	--	--	Molecular Function: DNA binding (GO:0003677);; Molecular Function: protein dimerization activity (GO:0046983);;	--	--	--	--	Helix-loop-helix DNA-binding domain	Transcription factor bHLH79 GN=MRG21.2 OS=Arabidopsis thaliana (Mouse-ear cress) PE=2 SV=1	K	Transcription	PREDICTED: transcription factor bHLH79 isoform X1 [Solanum lycopersicum]
F01_transcript_200456	0.00442927	-4.33651	down	--	--	--	--	--	--	--	--	Biological Process: metabolic process (GO:0008152);;	K09285|0|sot:102594405|K09285 AP2-like factor, ANT lineage | (RefSeq) AP2-like ethylene-responsive transcription factor AIL1	--	--	--	AP2 domain	AP2-like ethylene-responsive transcription factor AIL1 GN=AIL1 OS=Arabidopsis thaliana (Mouse-ear cress) PE=2 SV=1	K	Transcription	PREDICTED: AP2-like ethylene-responsive transcription factor AIL1-like [Solanum tuberosum]
F01_transcript_202161	5.94366e-05	3.35814	up	--	--	--	--	--	--	--	--	Molecular Function: protein dimerization activity (GO:0046983);;	--	--	--	--	Helix-loop-helix DNA-binding domain	Transcription factor bHLH79 GN=MRG21.2 OS=Arabidopsis thaliana (Mouse-ear cress) PE=2 SV=1	K	Transcription	PREDICTED: transcription factor bHLH79 isoform X1 [Solanum lycopersicum]
F01_transcript_179462	0.000591379	5.06051	up	--	--	--	--	--	--	--	--	--	--	--	--	--	K-box region;; SRF-type transcription factor (DNA-binding and dimerisation domain)	MADS-box transcription factor 22 GN=OJ1175_B01.24 OS=Oryza sativa subsp. japonica (Rice) PE=2 SV=1	K	Transcription	PREDICTED: MADS-box transcription factor 23-like [Solanum lycopersicum]
F01_transcript_98317	0.00438437	3.55268	up	--	--	--	--	--	--	--	--	Molecular Function: protein dimerization activity (GO:0046983);;	--	--	--	--	Helix-loop-helix DNA-binding domain	Transcription factor bHLH79 GN=MRG21.2 OS=Arabidopsis thaliana (Mouse-ear cress) PE=2 SV=1	K	Transcription	PREDICTED: transcription factor bHLH79-like [Solanum tuberosum]
F01_transcript_46161	--	--	--	0.0053392	3.50776	up	--	--	--	--	--	Molecular Function: nucleic acid binding (GO:0003676);; Biological Process: transcription, DNA-templated (GO:0006351);; Cellular Component: membrane (GO:0016020);;	--	--	--	--	Myb-like DNA-binding domain	Transcription factor DIVARICATA GN=DIVARICATA OS=Antirrhinum majus (Garden snapdragon) PE=2 SV=1	K	Transcription	PREDICTED: transcription factor MYB1R1-like isoform X3 [Solanum lycopersicum]
F01_transcript_105826	--	--	--	0.00532591	-4.63343	down	--	--	--	--	--	Molecular Function: transcription factor activity, sequence-specific DNA binding (GO:0003700);; Biological Process: regulation of transcription, DNA-templated (GO:0006355);; Molecular Function: sequence-specific DNA binding (GO:0043565);;	K14431|0|sot:102594517|K14431 transcription factor TGA | (RefSeq) transcription factor TGA2-like	ko04075:Plant hormone signal transduction	--	--	Seed dormancy control;; Basic region leucine zipper;; bZIP transcription factor	Transcription factor HBP-1b(c1) (Fragment) OS=Triticum aestivum (Wheat) PE=1 SV=2	K	Transcription	PREDICTED: transcription factor HBP-1b(c1)-like [Solanum tuberosum]
F01_transcript_45634	--	--	--	0.00217779	1.82688	up	--	--	--	--	--	Molecular Function: DNA binding (GO:0003677);; Molecular Function: transcription factor activity, sequence-specific DNA binding (GO:0003700);; Cellular Component: nucleus (GO:0005634);; Biological Process: regulation of transcription, DNA-templated (GO:0006355);; Molecular Function: 2-alkenal reductase [NAD(P)] activity (GO:0032440);; Molecular Function: protein dimerization activity (GO:0046983)…	K09264|1.30668e-169|sot:102602212|K09264 MADS-box transcription factor, plant | (RefSeq) MADS-box transcription factor 6	--	[K]	Transcription	K-box region;; SRF-type transcription factor (DNA-binding and dimerisation domain)	MADS-box transcription factor 6 OS=Oryza sativa subsp. japonica (Rice) PE=1 SV=1	K	Transcription	PREDICTED: MADS-box transcription factor 6-like [Solanum tuberosum]
F01_transcript_195103	--	--	--	0.00183264	-2.1763	down	--	--	--	--	--	Molecular Function: protein dimerization activity (GO:0046983);;	--	--	--	--	Helix-loop-helix DNA-binding domain	Transcription factor bHLH30 OS=Arabidopsis thaliana (Mouse-ear cress) PE=1 SV=1	K	Transcription	PREDICTED: transcription factor bHLH30-like [Solanum tuberosum]
F01_transcript_106463	--	--	--	0.00468676	1.68699	up	--	--	--	--	--	Biological Process: transcription, DNA-templated (GO:0006351);; Biological Process: response to auxin (GO:0009733);; Biological Process: regulation of ethylene-activated signaling pathway (GO:0010104);;	K09286|5.71965e-72|sot:102580681|K09286 EREBP-like factor | (RefSeq) ERF3; ethylene-responsive transcription factor 4-like	--	--	--	AP2 domain	Ethylene-responsive transcription factor 4 GN=ERF4 OS=Nicotiana sylvestris (Wood tobacco) PE=2 SV=1	K	Transcription	PREDICTED: ethylene-responsive transcription factor 4-like [Solanum tuberosum]
F01_transcript_52095	--	--	--	0.00315934	1.83833	up	--	--	--	--	--	Molecular Function: DNA binding (GO:0003677);; Molecular Function: transcription factor activity, sequence-specific DNA binding (GO:0003700);; Cellular Component: nucleus (GO:0005634);; Biological Process: regulation of transcription, DNA-templated (GO:0006355);;	K09286|7.7473e-80|sot:102594399|K09286 EREBP-like factor | (RefSeq) ethylene-responsive transcription factor ERF011-like	--	--	--	AP2 domain	Ethylene-responsive transcription factor ERF011 GN=ERF011 OS=Arabidopsis thaliana (Mouse-ear cress) PE=2 SV=1	K	Transcription	PREDICTED: ethylene-responsive transcription factor ERF010-like [Solanum tuberosum]
F01_transcript_45843	--	--	--	0.00254668	1.91021	up	--	--	--	--	--	Molecular Function: DNA binding (GO:0003677);; Molecular Function: transcription factor activity, sequence-specific DNA binding (GO:0003700);; Cellular Component: nucleus (GO:0005634);; Biological Process: regulation of transcription, DNA-templated (GO:0006355);; Biological Process: response to auxin (GO:0009733);; Biological Process: regulation of ethylene biosynthetic process (GO:0010364);;	K09286|3.18943e-107|sot:102585187|K09286 EREBP-like factor | (RefSeq) ethylene-responsive transcription factor 5-like	--	--	--	AP2 domain	Ethylene-responsive transcription factor 5 GN=ERF5 OS=Nicotiana tabacum (Common tobacco) PE=2 SV=1	K	Transcription	PREDICTED: ethylene-responsive transcription factor 5-like [Solanum tuberosum]
F01_transcript_156219	--	--	--	0.00823532	1.58739	up	--	--	--	[K]	Transcription	Biological Process: DNA-templated transcription, initiation (GO:0006352);; Biological Process: regulation of transcription, DNA-templated (GO:0006355);; Molecular Function: zinc ion binding (GO:0008270);; Molecular Function: TBP-class protein binding (GO:0017025);;	K03124|0|sot:102594013|K03124 transcription initiation factor TFIIB | (RefSeq) transcription initiation factor IIB-2-like	ko03022:Basal transcription factors	[K]	Transcription	Transcription factor TFIIB repeat;; TFIIB zinc-binding;; Cyclin, N-terminal domain	Transcription initiation factor IIB-2 GN=TFIIB2 OS=Arabidopsis thaliana (Mouse-ear cress) PE=2 SV=1	K	Transcription	PREDICTED: transcription initiation factor IIB-2-like isoform X1 [Solanum tuberosum]
F01_transcript_3862	--	--	--	1.66383e-07	2.99785	up	--	--	--	--	--	Molecular Function: protein dimerization activity (GO:0046983);;	--	--	--	--	--	Transcription factor BPE GN=T30E16.21 OS=Arabidopsis thaliana (Mouse-ear cress) PE=2 SV=1	K	Transcription	PREDICTED: transcription factor bHLH79-like [Solanum tuberosum]
F01_transcript_171114	--	--	--	0.0028203	-3.03967	down	--	--	--	--	--	Molecular Function: transcription factor activity, sequence-specific DNA binding (GO:0003700);; Molecular Function: protein serine/threonine kinase activity (GO:0004674);; Cellular Component: nucleus (GO:0005634);; Cellular Component: cytosol (GO:0005829);; Biological Process: protein phosphorylation (GO:0006468);; Biological Process: maintenance of root meristem identity (GO:0010078);; Biologica…	--	--	--	--	bHLH-MYC and R2R3-MYB transcription factors N-terminal	Transcription factor LHW GN=F12K2 OS=Arabidopsis thaliana (Mouse-ear cress) PE=1 SV=1	S	Function unknown	PREDICTED: transcription factor LHW-like [Solanum tuberosum]
F01_transcript_190925	--	--	--	0.000388418	3.71296	up	--	--	--	--	--	Molecular Function: DNA binding (GO:0003677);; Molecular Function: transcription factor activity, sequence-specific DNA binding (GO:0003700);; Cellular Component: nucleus (GO:0005634);; Biological Process: regulation of transcription, DNA-templated (GO:0006355);; Biological Process: regulation of ethylene-activated signaling pathway (GO:0010104);;	--	--	--	--	AP2 domain	Ethylene-responsive transcription factor 1B GN=K14B15.15 OS=Arabidopsis thaliana (Mouse-ear cress) PE=1 SV=2	K	Transcription	transcription factor TSRF1 [Solanum lycopersicum]
F01_transcript_91685	--	--	--	0.000274419	-3.62185	down	--	--	--	--	--	Biological Process: regulation of leaf development (GO:2000024);;	--	--	--	--	TCP family transcription factor	Transcription factor TCP12 GN=F14K14.9 OS=Arabidopsis thaliana (Mouse-ear cress) PE=2 SV=1	K	Transcription	PREDICTED: transcription factor TCP12-like [Solanum tuberosum]
F01_transcript_109050	--	--	--	0.00606658	-2.9728	down	--	--	--	--	--	Cellular Component: nucleus (GO:0005634);; Biological Process: regulation of secondary shoot formation (GO:2000032);;	--	--	--	--	TCP family transcription factor	Transcription factor TCP12 GN=F14K14.9 OS=Arabidopsis thaliana (Mouse-ear cress) PE=2 SV=1	K	Transcription	PREDICTED: transcription factor TCP12-like [Solanum lycopersicum]
F01_transcript_196790	--	--	--	4.34347e-06	#NAME?	down	--	--	--	--	--	Molecular Function: DNA binding (GO:0003677);;	K09422|0|sot:102583173|K09422 myb proto-oncogene protein, plant | (RefSeq) transcription factor RAX3	--	[K]	Transcription	Myb-like DNA-binding domain;; Myb-like DNA-binding domain	Transcription factor RAX3 GN=T16K5.40 OS=Arabidopsis thaliana (Mouse-ear cress) PE=2 SV=1	K	Transcription	PREDICTED: transcription factor RAX3-like [Solanum tuberosum]
F01_transcript_54541	--	--	--	8.83258e-07	-5.86231	down	--	--	--	--	--	Molecular Function: DNA binding (GO:0003677);; Cellular Component: nucleus (GO:0005634);;	--	--	[O]	Posttranslational modification, protein turnover, chaperones	Myb-like DNA-binding domain	Transcription factor RADIALIS GN=RAD OS=Antirrhinum majus (Garden snapdragon) PE=1 SV=1	K	Transcription	PREDICTED: transcription factor RADIALIS [Solanum lycopersicum]
F01_transcript_169510	--	--	--	0.000460898	4.4281	up	--	--	--	--	--	Molecular Function: DNA binding (GO:0003677);;	K09422|3.23208e-94|sly:101250648|K09422 myb proto-oncogene protein, plant | (RefSeq) transcription factor MYB113-like	--	[K]	Transcription	Myb-like DNA-binding domain;; Myb-like DNA-binding domain	Transcription factor MYB113 GN=MYB113 OS=Arabidopsis thaliana (Mouse-ear cress) PE=1 SV=1	K	Transcription	MYB transcription factor [Solanum melongena]
F01_transcript_119578	--	--	--	4.83105e-06	#NAME?	down	--	--	--	--	--	Molecular Function: DNA binding (GO:0003677);; Molecular Function: protein dimerization activity (GO:0046983);;	--	--	--	--	--	Transcription factor PRE4 GN=T23J7.40 OS=Arabidopsis thaliana (Mouse-ear cress) PE=1 SV=1	K	Transcription	PREDICTED: transcription factor ILI5-like [Nicotiana sylvestris]
F01_transcript_80846	--	--	--	0.00233482	4.63967	up	--	--	--	--	--	Molecular Function: DNA binding (GO:0003677);;	K09422|6.81236e-102|sly:101250648|K09422 myb proto-oncogene protein, plant | (RefSeq) transcription factor MYB113-like	--	[K]	Transcription	--	Transcription factor MYB113 GN=MYB113 OS=Arabidopsis thaliana (Mouse-ear cress) PE=1 SV=1	K	Transcription	MYB transcription factor [Solanum melongena]
F01_transcript_106606	--	--	--	0.00859513	3.25745	up	--	--	--	--	--	Molecular Function: DNA binding (GO:0003677);; Molecular Function: transcription factor activity, sequence-specific DNA binding (GO:0003700);; Cellular Component: nucleus (GO:0005634);; Biological Process: regulation of transcription, DNA-templated (GO:0006355);;	--	--	--	--	AP2 domain	Ethylene-responsive transcription factor ERF110 GN=ERF110 OS=Arabidopsis thaliana (Mouse-ear cress) PE=2 SV=2	K	Transcription	PREDICTED: ethylene-responsive transcription factor ABR1-like [Solanum tuberosum]
F01_transcript_14960	--	--	--	0.000121664	4.48522	up	--	--	--	--	--	Molecular Function: DNA binding (GO:0003677);;	K09422|6.40796e-14|sly:101250648|K09422 myb proto-oncogene protein, plant | (RefSeq) transcription factor MYB113-like	--	[K]	Transcription	Myb-like DNA-binding domain;; Myb-like DNA-binding domain	Transcription factor MYB113 GN=MYB113 OS=Arabidopsis thaliana (Mouse-ear cress) PE=1 SV=1	K	Transcription	MYB transcription factor [Solanum melongena]
F01_transcript_146737	--	--	--	0.00931883	-2.15879	down	--	--	--	--	--	Molecular Function: DNA binding (GO:0003677);; Molecular Function: transcription factor activity, sequence-specific DNA binding (GO:0003700);; Cellular Component: nucleus (GO:0005634);; Cellular Component: transcription factor complex (GO:0005667);; Biological Process: regulation of transcription, DNA-templated (GO:0006355);; Biological Process: negative regulation of DNA endoreduplication (GO:00…	K09391|0|sot:102579077|K09391 transcription factor E2F7/8 | (RefSeq) E2F transcription factor-like E2FE	--	[K]	Transcription	E2F/DP family winged-helix DNA-binding domain	E2F transcription factor-like E2FE GN=T24C20.40 OS=Arabidopsis thaliana (Mouse-ear cress) PE=2 SV=1	K	Transcription	PREDICTED: E2F transcription factor-like E2FE-like isoform X2 [Solanum tuberosum]
F01_transcript_55085	--	--	--	5.39706e-06	-4.81182	down	--	--	--	--	--	Molecular Function: protein dimerization activity (GO:0046983);;	--	--	--	--	Helix-loop-helix DNA-binding domain	Transcription factor PRE5 GN=MLD15.1 OS=Arabidopsis thaliana (Mouse-ear cress) PE=1 SV=1	K	Transcription	PREDICTED: transcription factor PRE6 isoform X2 [Solanum lycopersicum]
F01_transcript_3910	--	--	--	0.0032077	-2.46633	down	--	--	--	--	--	Molecular Function: protein dimerization activity (GO:0046983);;	--	--	--	--	bHLH-MYC and R2R3-MYB transcription factors N-terminal	Transcription factor LHW GN=F12K2 OS=Arabidopsis thaliana (Mouse-ear cress) PE=1 SV=1	S	Function unknown	PREDICTED: transcription factor bHLH157-like [Solanum tuberosum]
F01_transcript_200218	--	--	--	5.36249e-08	3.76462	up	--	--	--	--	--	Molecular Function: DNA binding (GO:0003677);;	K09422|0|sot:102586262|K09422 myb proto-oncogene protein, plant | (RefSeq) transcription factor RAX3	--	[K]	Transcription	Myb-like DNA-binding domain;; Myb-like DNA-binding domain	Transcription factor GAMYB OS=Oryza sativa subsp. japonica (Rice) PE=2 SV=1	K	Transcription	PREDICTED: transcription factor RAX3-like [Solanum tuberosum]
F01_transcript_18084	--	--	--	0.00159292	-2.09799	down	--	--	--	--	--	--	K09285|0|sot:102581225|K09285 AP2-like factor, ANT lineage | (RefSeq) AP2-like ethylene-responsive transcription factor ANT	--	--	--	AP2 domain	AP2-like ethylene-responsive transcription factor ANT GN=T28I19.30 OS=Arabidopsis thaliana (Mouse-ear cress) PE=1 SV=2	K	Transcription	PREDICTED: AP2-like ethylene-responsive transcription factor ANT-like isoform X1 [Solanum tuberosum]
F01_transcript_17406	--	--	--	0.00903616	-2.12072	down	--	--	--	--	--	--	K09285|0|sot:102582990|K09285 AP2-like factor, ANT lineage | (RefSeq) AP2-like ethylene-responsive transcription factor AIL7	--	--	--	AP2 domain	AP2-like ethylene-responsive transcription factor AIL6 GN=AIL6 OS=Arabidopsis thaliana (Mouse-ear cress) PE=2 SV=1	K	Transcription	PREDICTED: AP2-like ethylene-responsive transcription factor AIL6 [Solanum lycopersicum]
F01_transcript_25542	--	--	--	0.00104331	3.45526	up	--	--	--	--	--	--	--	--	--	--	WRKY DNA -binding domain	WRKY transcription factor 44 GN=F3G5.5 OS=Arabidopsis thaliana (Mouse-ear cress) PE=1 SV=2	K	Transcription	PREDICTED: WRKY transcription factor 44 [Solanum lycopersicum]
F01_transcript_10558	--	--	--	5.81677e-05	-3.34515	down	--	--	--	--	--	Molecular Function: DNA binding (GO:0003677);; Molecular Function: transcription factor activity, sequence-specific DNA binding (GO:0003700);; Cellular Component: nucleus (GO:0005634);; Biological Process: regulation of transcription, DNA-templated (GO:0006355);; Biological Process: multicellular organism development (GO:0007275);;	K09285|0|sot:102581225|K09285 AP2-like factor, ANT lineage | (RefSeq) AP2-like ethylene-responsive transcription factor ANT	--	--	--	AP2 domain	AP2-like ethylene-responsive transcription factor ANT GN=T28I19.30 OS=Arabidopsis thaliana (Mouse-ear cress) PE=1 SV=2	K	Transcription	PREDICTED: AP2-like ethylene-responsive transcription factor ANT-like isoform X1 [Solanum tuberosum]
F01_transcript_203501	--	--	--	0.00838782	2.56396	up	--	--	--	--	--	Molecular Function: protein dimerization activity (GO:0046983);;	--	--	--	--	Helix-loop-helix DNA-binding domain	Transcription factor BPE GN=T30E16.21 OS=Arabidopsis thaliana (Mouse-ear cress) PE=2 SV=1	K	Transcription	PREDICTED: transcription factor bHLH79-like [Solanum tuberosum]
F01_transcript_30136	--	--	--	6.24649e-06	-2.55942	down	--	--	--	--	--	Biological Process: regulation of transcription, DNA-templated (GO:0006355);; Biological Process: regulation of leaf development (GO:2000024);;	--	--	--	--	TCP family transcription factor	Transcription factor TCP7 GN=TCP7 OS=Arabidopsis thaliana (Mouse-ear cress) PE=2 SV=1	K	Transcription	TCP transcription factor 14 [Solanum lycopersicum]
F01_transcript_39456	--	--	--	8.59993e-05	-2.66764	down	--	--	--	--	--	Molecular Function: protein dimerization activity (GO:0046983);;	--	--	--	--	bHLH-MYC and R2R3-MYB transcription factors N-terminal;; Helix-loop-helix DNA-binding domain	Transcription factor bHLH14 OS=Arabidopsis thaliana (Mouse-ear cress) PE=2 SV=1	--	--	PREDICTED: transcription factor MYC2-like [Solanum tuberosum]
F01_transcript_51932	--	--	--	0.000762485	3.444	up	--	--	--	--	--	--	--	--	--	--	Helix-loop-helix DNA-binding domain	Transcription factor bHLH35 GN=MUL3.10 OS=Arabidopsis thaliana (Mouse-ear cress) PE=2 SV=1	K	Transcription	PREDICTED: transcription factor bHLH35-like isoform X2 [Nicotiana sylvestris]
F01_transcript_39631	--	--	--	0.000101065	-5.05357	down	--	--	--	--	--	Molecular Function: protein dimerization activity (GO:0046983);;	--	--	--	--	Helix-loop-helix DNA-binding domain	Transcription factor bHLH91 GN=F16D14.5 OS=Arabidopsis thaliana (Mouse-ear cress) PE=2 SV=1	--	--	PREDICTED: transcription factor bHLH89-like [Solanum tuberosum]
F01_transcript_12296	--	--	--	9.79448e-09	4.46272	up	--	--	--	--	--	--	--	--	[K]	Transcription	Myb/SANT-like DNA-binding domain;; Myb-like DNA-binding domain;; Alcohol dehydrogenase transcription factor Myb/SANT-like	Trihelix transcription factor GT-2 GN=GT-2 OS=Arabidopsis thaliana (Mouse-ear cress) PE=2 SV=1	K	Transcription	PREDICTED: trihelix transcription factor GTL1-like [Solanum tuberosum]
F01_transcript_157055	--	--	--	5.5559e-05	-3.1614	down	--	--	--	--	--	Biological Process: cellular process (GO:0009987);; Biological Process: regulation of biological process (GO:0050789);; Biological Process: phyllotactic patterning (GO:0060771);;	K09285|0|sot:102589729|K09285 AP2-like factor, ANT lineage | (RefSeq) AP2-like ethylene-responsive transcription factor AIL5	--	--	--	AP2 domain	AP2-like ethylene-responsive transcription factor AIL5 GN=AIL5 OS=Arabidopsis thaliana (Mouse-ear cress) PE=2 SV=2	K	Transcription	PREDICTED: AP2-like ethylene-responsive transcription factor AIL5-like [Solanum tuberosum]
F01_transcript_126006	--	--	--	0.0049637	-1.83533	down	--	--	--	--	--	Molecular Function: transcription factor activity, sequence-specific DNA binding (GO:0003700);; Cellular Component: nucleus (GO:0005634);; Biological Process: regulation of transcription, DNA-templated (GO:0006355);; Molecular Function: sequence-specific DNA binding (GO:0043565);;	K09419|0|sly:101266155|K09419 heat shock transcription factor, other eukaryote | (RefSeq) heat stress transcription factor A-7a	--	[K]	Transcription	HSF-type DNA-binding	Heat stress transcription factor A-2b OS=Oryza sativa subsp. japonica (Rice) PE=2 SV=1	K	Transcription	PREDICTED: heat stress transcription factor A-7a isoform X5 [Solanum lycopersicum]
F01_transcript_153980	--	--	--	--	--	--	0.00218681	-3.95653	down	--	--	Biological Process: regulation of leaf development (GO:2000024);;	--	--	--	--	TCP family transcription factor	Transcription factor TCP4 GN=K15M2.17 OS=Arabidopsis thaliana (Mouse-ear cress) PE=2 SV=1	K	Transcription	PREDICTED: transcription factor TCP4-like [Solanum tuberosum]
F01_transcript_103923	--	--	--	--	--	--	0.00026121	-4.69103	down	--	--	Molecular Function: DNA binding (GO:0003677);; Molecular Function: transcription factor activity, sequence-specific DNA binding (GO:0003700);; Cellular Component: nucleus (GO:0005634);; Biological Process: regulation of transcription, DNA-templated (GO:0006355);;	--	--	--	--	AP2 domain	Ethylene-responsive transcription factor CRF4 GN=T13J8.60 OS=Arabidopsis thaliana (Mouse-ear cress) PE=1 SV=2	--	--	PREDICTED: ethylene-responsive transcription factor CRF3-like [Nicotiana sylvestris]
F01_transcript_160474	--	--	--	--	--	--	0.00310578	-3.28403	down	--	--	Molecular Function: DNA binding (GO:0003677);;	--	--	[K]	Transcription	Myb-like DNA-binding domain;; Myb-like DNA-binding domain	Transcription factor MYB12 GN=T30B22.24 OS=Arabidopsis thaliana (Mouse-ear cress) PE=2 SV=1	K	Transcription	PREDICTED: transcription factor MYB12-like [Solanum tuberosum]
F01_transcript_138324	--	--	--	--	--	--	0.00034561	-4.59758	down	--	--	--	--	--	--	--	WRKY DNA -binding domain	Probable WRKY transcription factor 4 GN=WRKY4 OS=Arabidopsis thaliana (Mouse-ear cress) PE=1 SV=2	K	Transcription	PREDICTED: probable WRKY transcription factor 26 isoform X1 [Nicotiana sylvestris]
F01_transcript_159994	--	--	--	--	--	--	0.000422752	-3.57107	down	--	--	Biological Process: regulation of leaf development (GO:2000024);;	--	--	--	--	--	Transcription factor TCP4 GN=K15M2.17 OS=Arabidopsis thaliana (Mouse-ear cress) PE=2 SV=1	K	Transcription	TCP transcription factor 3 [Solanum lycopersicum]
F01_transcript_74850	--	--	--	--	--	--	0.000608654	-3.27429	down	--	--	Molecular Function: RNA polymerase II regulatory region sequence-specific DNA binding (GO:0000977);; Molecular Function: RNA polymerase II transcription factor binding (GO:0001085);; Molecular Function: transcriptional activator activity, RNA polymerase II transcription regulatory region sequence-specific binding (GO:0001228);; Molecular Function: chromatin binding (GO:0003682);; Cellular Compone…	--	--	[K]	Transcription	GATA zinc finger	GATA transcription factor 12 GN=GATA12 OS=Arabidopsis thaliana (Mouse-ear cress) PE=2 SV=1	K	Transcription	PREDICTED: GATA transcription factor 12 [Solanum lycopersicum]
F01_transcript_88223	--	--	--	--	--	--	0.00156838	-4.07722	down	--	--	Molecular Function: DNA binding (GO:0003677);; Molecular Function: transcription factor activity, sequence-specific DNA binding (GO:0003700);; Cellular Component: nucleus (GO:0005634);; Biological Process: regulation of transcription, DNA-templated (GO:0006355);; Biological Process: multicellular organism development (GO:0007275);;	K09285|2.62052e-31|sot:102591293|K09285 AP2-like factor, ANT lineage | (RefSeq) AP2-like ethylene-responsive transcription factor At1g16060	--	--	--	AP2 domain	AP2-like ethylene-responsive transcription factor At1g16060 GN=At1g16060 OS=Arabidopsis thaliana (Mouse-ear cress) PE=2 SV=1	K	Transcription	PREDICTED: AP2-like ethylene-responsive transcription factor At1g16060-like [Solanum tuberosum]
F01_transcript_13191	--	--	--	--	--	--	0.00488407	-2.08898	down	--	--	Molecular Function: DNA binding (GO:0003677);;	K09422|0|sot:102590821|K09422 myb proto-oncogene protein, plant | (RefSeq) transcription factor GAMYB-like	--	[K]	Transcription	Myb-like DNA-binding domain;; Myb-like DNA-binding domain	Transcription factor GAMYB GN=GAM1 OS=Oryza sativa subsp. indica (Rice) PE=2 SV=1	K	Transcription	PREDICTED: transcription factor GAMYB-like isoform X1 [Solanum tuberosum]
F01_transcript_97435	--	--	--	--	--	--	2.03064e-07	5.84506	up	--	--	--	--	--	--	--	--	Transcription factor bHLH60 OS=Arabidopsis thaliana (Mouse-ear cress) PE=2 SV=1	K	Transcription	PREDICTED: transcription factor bHLH48-like [Solanum tuberosum]
F01_transcript_15579	--	--	--	--	--	--	0.00129879	#NAME?	down	--	--	Molecular Function: DNA binding (GO:0003677);; Cellular Component: nucleus (GO:0005634);; Biological Process: regulation of transcription, DNA-templated (GO:0006355);;	--	--	--	--	B3 DNA binding domain	B3 domain-containing transcription factor ABI3 GN=ABI3 OS=Arabidopsis thaliana (Mouse-ear cress) PE=1 SV=1	K	Transcription	PREDICTED: B3 domain-containing transcription factor ABI3 [Solanum lycopersicum]
F01_transcript_132336	--	--	--	--	--	--	0.00124687	8.46539	up	--	--	Molecular Function: DNA binding (GO:0003677);; Molecular Function: transcription factor activity, sequence-specific DNA binding (GO:0003700);; Cellular Component: nucleus (GO:0005634);; Biological Process: regulation of transcription, DNA-templated (GO:0006355);;	--	--	--	--	AP2 domain	Ethylene-responsive transcription factor ERF110 GN=ERF110 OS=Arabidopsis thaliana (Mouse-ear cress) PE=2 SV=2	K	Transcription	PREDICTED: ethylene-responsive transcription factor ABR1-like isoform X2 [Solanum tuberosum]
F01_transcript_50488	--	--	--	--	--	--	0.000967887	-5.80652	down	--	--	Molecular Function: DNA binding (GO:0003677);; Molecular Function: transcription factor activity, sequence-specific DNA binding (GO:0003700);; Cellular Component: nucleus (GO:0005634);; Biological Process: regulation of transcription, DNA-templated (GO:0006355);;	--	--	--	--	AP2 domain	Ethylene-responsive transcription factor WIN1 GN=F9L1.31 OS=Arabidopsis thaliana (Mouse-ear cress) PE=2 SV=1	K	Transcription	PREDICTED: ethylene-responsive transcription factor WIN1-like [Solanum tuberosum]
F01_transcript_83164	--	--	--	--	--	--	0.000452266	#NAME?	down	--	--	Molecular Function: nucleotide binding (GO:0000166);; Molecular Function: nucleic acid binding (GO:0003676);; Molecular Function: zinc ion binding (GO:0008270);;	K14651|3.00419e-113|sly:101259398|K14651 transcription initiation factor TFIID subunit 15 | (RefSeq) transcription initiation factor TFIID subunit 15	ko03022:Basal transcription factors	[R]	General function prediction only	--	Transcription initiation factor TFIID subunit 15 GN=TAF15 OS=Arabidopsis thaliana (Mouse-ear cress) PE=1 SV=1	S	Function unknown	PREDICTED: transcription initiation factor TFIID subunit 15 isoform X2 [Solanum lycopersicum]
F01_transcript_69645	--	--	--	--	--	--	3.52625e-07	-3.56082	down	--	--	Biological Process: regulation of leaf development (GO:2000024);;	--	--	--	--	TCP family transcription factor	Transcription factor TCP4 GN=K15M2.17 OS=Arabidopsis thaliana (Mouse-ear cress) PE=2 SV=1	K	Transcription	PREDICTED: transcription factor TCP4-like [Solanum tuberosum]

## Sheet: Supplementary Table 3
The expression of common MYB transcription factors DEGs related to male sterility in 8DBF vs FD and 5DBF vs FD
Gene ID	F142-1-1_F142-1-2_F142-1-3_vs_F142-2-1_F142-2-2_F142-2-3_FDR	F142-1-1_F142-1-2_F142-1-3_vs_F142-2-1_F142-2-2_F142-2-3_log2FC	F142-1-1_F142-1-2_F142-1-3_vs_F142-2-1_F142-2-2_F142-2-3_regulated	F142-1-1_F142-1-2_F142-1-3_vs_F142-3-1_F142-3-2_F142-3-3_FDR	F142-1-1_F142-1-2_F142-1-3_vs_F142-3-1_F142-3-2_F142-3-3_log2FC	F142-1-1_F142-1-2_F142-1-3_vs_F142-3-1_F142-3-2_F142-3-3_regulated	F142-2-1_F142-2-2_F142-2-3_vs_F142-3-1_F142-3-2_F142-3-3_FDR	F142-2-1_F142-2-2_F142-2-3_vs_F142-3-1_F142-3-2_F142-3-3_log2FC	F142-2-1_F142-2-2_F142-2-3_vs_F142-3-1_F142-3-2_F142-3-3_regulated	COG_class	COG_class_annotation	GO_annotation	KEGG_annotation	KEGG_pathway	KOG_class	KOG_class_annotation	Pfam_annotation	Swissprot_annotation	eggNOG_class	eggNOG_class_annotation	nr_annotation
F01_transcript_42496	--	--	--	6.38867e-18	5.33683	up	2.9233e-16	5.13563	up	--	--	Molecular Function: DNA binding (GO:0003677);;	K09422|5.89646e-162|sot:102606117|K09422 myb proto-oncogene protein, plant | (RefSeq) transcription factor MYB108	--	[K]	Transcription	Myb-like DNA-binding domain;; Myb-like DNA-binding domain	Transcription factor MYB108 GN=F5E6.18 OS=Arabidopsis thaliana (Mouse-ear cress) PE=1 SV=1	K	Transcription	PREDICTED: transcription factor MYB21-like [Solanum tuberosum]
F01_transcript_41343	--	--	--	1.07154e-06	#NAME?	down	2.71575e-05	#NAME?	down	--	--	Molecular Function: DNA binding (GO:0003677);;	K09422|1.45549e-168|sot:102584044|K09422 myb proto-oncogene protein, plant | (RefSeq) transcription factor MYB21	--	[K]	Transcription	Myb-like DNA-binding domain;; Myb-like DNA-binding domain	Transcription factor MYB86 GN=F21E10.4 OS=Arabidopsis thaliana (Mouse-ear cress) PE=2 SV=1	K	Transcription	PREDICTED: transcription factor MYB86-like [Solanum tuberosum]
F01_transcript_39366	3.80693e-07	2.78199	up	--	--	--	2.05243e-07	2.70257	up	--	--	Molecular Function: DNA binding (GO:0003677);; Cellular Component: nucleus (GO:0005634);; Biological Process: regulation of transcription, DNA-templated (GO:0006355);; Molecular Function: zinc ion binding (GO:0008270);; Biological Process: response to ethylene (GO:0009723);;	--	--	--	--	Myb-like DNA-binding domain	Transcription factor DIVARICATA GN=DIVARICATA OS=Antirrhinum majus (Garden snapdragon) PE=2 SV=1	K	Transcription	PREDICTED: transcription factor MYB1R1 [Solanum lycopersicum]
F01_transcript_65733	--	--	--	--	--	--	--	--	--	--	--	Molecular Function: calmodulin binding (GO:0005516);;	--	--	--	--	--	--	S	Function unknown	PREDICTED: myb-like protein X-like [Solanum tuberosum]
F01_transcript_170605	0.000229751	4.99475	up	--	--	--	0.00327516	3.89584	up	--	--	--	K09422|1.78445e-128|sot:102587827|K09422 myb proto-oncogene protein, plant | (RefSeq) transcription factor MYB108-like	--	[K]	Transcription	Myb-like DNA-binding domain;; Myb-like DNA-binding domain	Transcription factor MYB108 GN=F5E6.18 OS=Arabidopsis thaliana (Mouse-ear cress) PE=1 SV=1	K	Transcription	PREDICTED: transcription factor MYB21-like [Solanum tuberosum]
F01_transcript_163549	5.04743e-08	10.7551	up	--	--	--	0.000525448	5.15738	up	--	--	Molecular Function: DNA binding (GO:0003677);;	K09422|5.45951e-102|sly:101250648|K09422 myb proto-oncogene protein, plant | (RefSeq) transcription factor MYB113-like	--	[K]	Transcription	--	Transcription factor MYB113 GN=MYB113 OS=Arabidopsis thaliana (Mouse-ear cress) PE=1 SV=1	K	Transcription	MYB transcription factor [Solanum melongena]
F01_transcript_23887	--	--	--	--	--	--	--	--	--	--	--	Molecular Function: DNA binding (GO:0003677);;	K09422|0|sly:101263611|K09422 myb proto-oncogene protein, plant | (RefSeq) SlMYB117; R2R3MYB transcription factor 117	--	[K]	Transcription	Myb-like DNA-binding domain;; Myb-like DNA-binding domain	Transcription factor MYB44 GN=K8K14.2 OS=Arabidopsis thaliana (Mouse-ear cress) PE=2 SV=1	K	Transcription	PREDICTED: myb-like protein Q [Solanum lycopersicum]
F01_transcript_110440	--	--	--	--	--	--	--	--	--	--	--	Molecular Function: calmodulin binding (GO:0005516);;	--	--	--	--	Plant calmodulin-binding domain	--	S	Function unknown	PREDICTED: myb-like protein X-like [Solanum tuberosum]
F01_transcript_117461	--	--	--	--	--	--	--	--	--	--	--	Molecular Function: DNA binding (GO:0003677);;	K09422|0|sly:101250177|K09422 myb proto-oncogene protein, plant | (RefSeq) myb-related protein 306	--	[K]	Transcription	Myb-like DNA-binding domain;; Myb-like DNA-binding domain	Transcription factor MYB39 GN=dl4925c OS=Arabidopsis thaliana (Mouse-ear cress) PE=2 SV=1	K	Transcription	PREDICTED: myb-related protein 306 [Solanum lycopersicum]
F01_transcript_202206	8.10991e-09	4.44364	up	--	--	--	0.00154166	2.51489	up	--	--	Molecular Function: DNA binding (GO:0003677);;	--	--	[K]	Transcription	--	Transcription factor MYB44 GN=K8K14.2 OS=Arabidopsis thaliana (Mouse-ear cress) PE=2 SV=1	K	Transcription	PREDICTED: transcription factor MYB44-like [Solanum lycopersicum]
F01_transcript_106349	--	--	--	--	--	--	--	--	--	--	--	Molecular Function: DNA binding (GO:0003677);;	K09422|1.00203e-91|sot:102596297|K09422 myb proto-oncogene protein, plant | (RefSeq) transcription repressor MYB6-like	--	[K]	Transcription	Myb-like DNA-binding domain;; Myb-like DNA-binding domain;; Myb-like DNA-binding domain	Transcription repressor MYB4 GN=MYB4 OS=Arabidopsis thaliana (Mouse-ear cress) PE=1 SV=1	K	Transcription	PREDICTED: transcription factor MYB3-like [Solanum tuberosum]
